# Supplementary material for: Bundle Size Engineering of Single-Walled Carbon Nanotubes on Silica Nanoparticles
Source: Hindawi journal article supplement (doi:10.1155/2017/6379358), 2017-01-01
Supplement: f1 [file 6379358.f1.pdf]

# Bundle Size Engineering of Single-Walled Carbon Nanotubes on Silica Nanoparticles

Deok Min Seo<sup>1</sup>, Myung Gwan Hahm<sup>1</sup>, Young Lae Kim<sup>2\*</sup>

<sup>1</sup>Department of Materials Science and Engineering, Inha University, 100 Inharo, Nam-gu, Incheon 22212, Republic of Korea.

<sup>2</sup>Department of Mechanical and Industrial Engineering, Northeastern University, 360 Huntington Avenue, Boston, MA 02115, USA

\*Corresponding author: kim.youn@husky.neu.edu

## Supporting Information

### 1. D and G band Raman spectra recorded from the SWCNTs:

The Raman spectra recorded from SWCNTs bundles grown on 50 and 200 nm silica nanoparticles with two different concentration of Co-acetate solutions show D and G band spectra of SWCNTs as shown in Figure S1. The peak area ratio of the D and G bands indicates the degree of disorder on SWCNTs. Showing in Figure S1, the degree of disorder on SWCNTs grown with higher concentrated Co-acetate solution is slightly higher than SWCNTs synthesized with lower concentrated Co-acetate solution. In other words, small-bundled SWCNTs have relatively high quality graphitic structures than large-bundled SWCNTs.

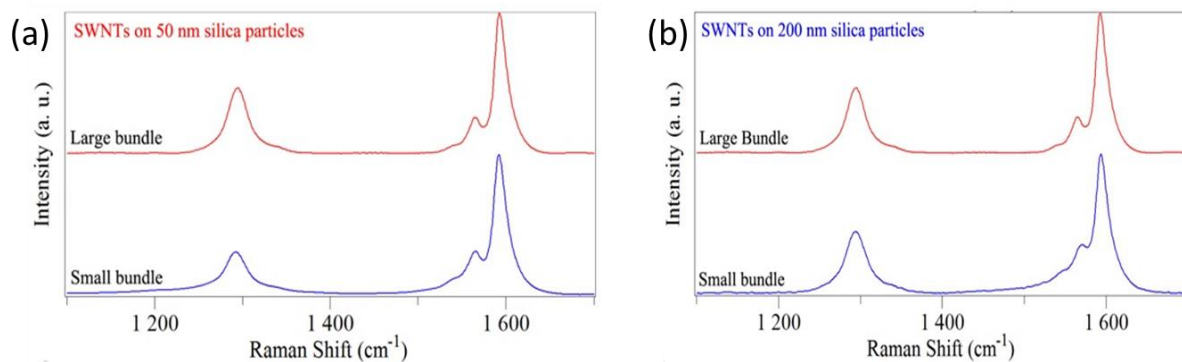

**Figure S1.** Raman spectra from SWCNT bundles from on 50nm silica particles and 200nm silica particles recorded with 785 nm wavelength laser. a) D and G band spectra recorded from SWCNTs grown on small-diametered Co clusters (red) and large-diametered Co clusters (blue) on 50 nm silica nanoparticles b) D and G band spectra recorded from SWCNTs grown on small-diametered Co clusters (red) and large-diametered Co clusters (blue) on 200 nm silica nanoparticles.
